# Supplementary material
Source: PubMed Central journal article supplement (PMC4560688)
Supplement: NIHMS664553-supplement-1.pdf [file NIHMS664553-supplement-1.pdf]

**Supplemental Figures and Text.**

**PGC-1/*spargel* counteracts high fat diet-induced  
obesity and cardiac lipotoxicity downstream  
of TOR and Brummer ATGL lipase**

Soda Balla Diop<sup>1</sup>, Jumana [Bisharat-Kernizan](#)<sup>1</sup>, Ryan Tyge Birse<sup>1</sup>, Sean Oldham<sup>1</sup>, Karen Ocorr<sup>1</sup>,  
Rolf Bodmer<sup>1</sup> \*

Figure S1

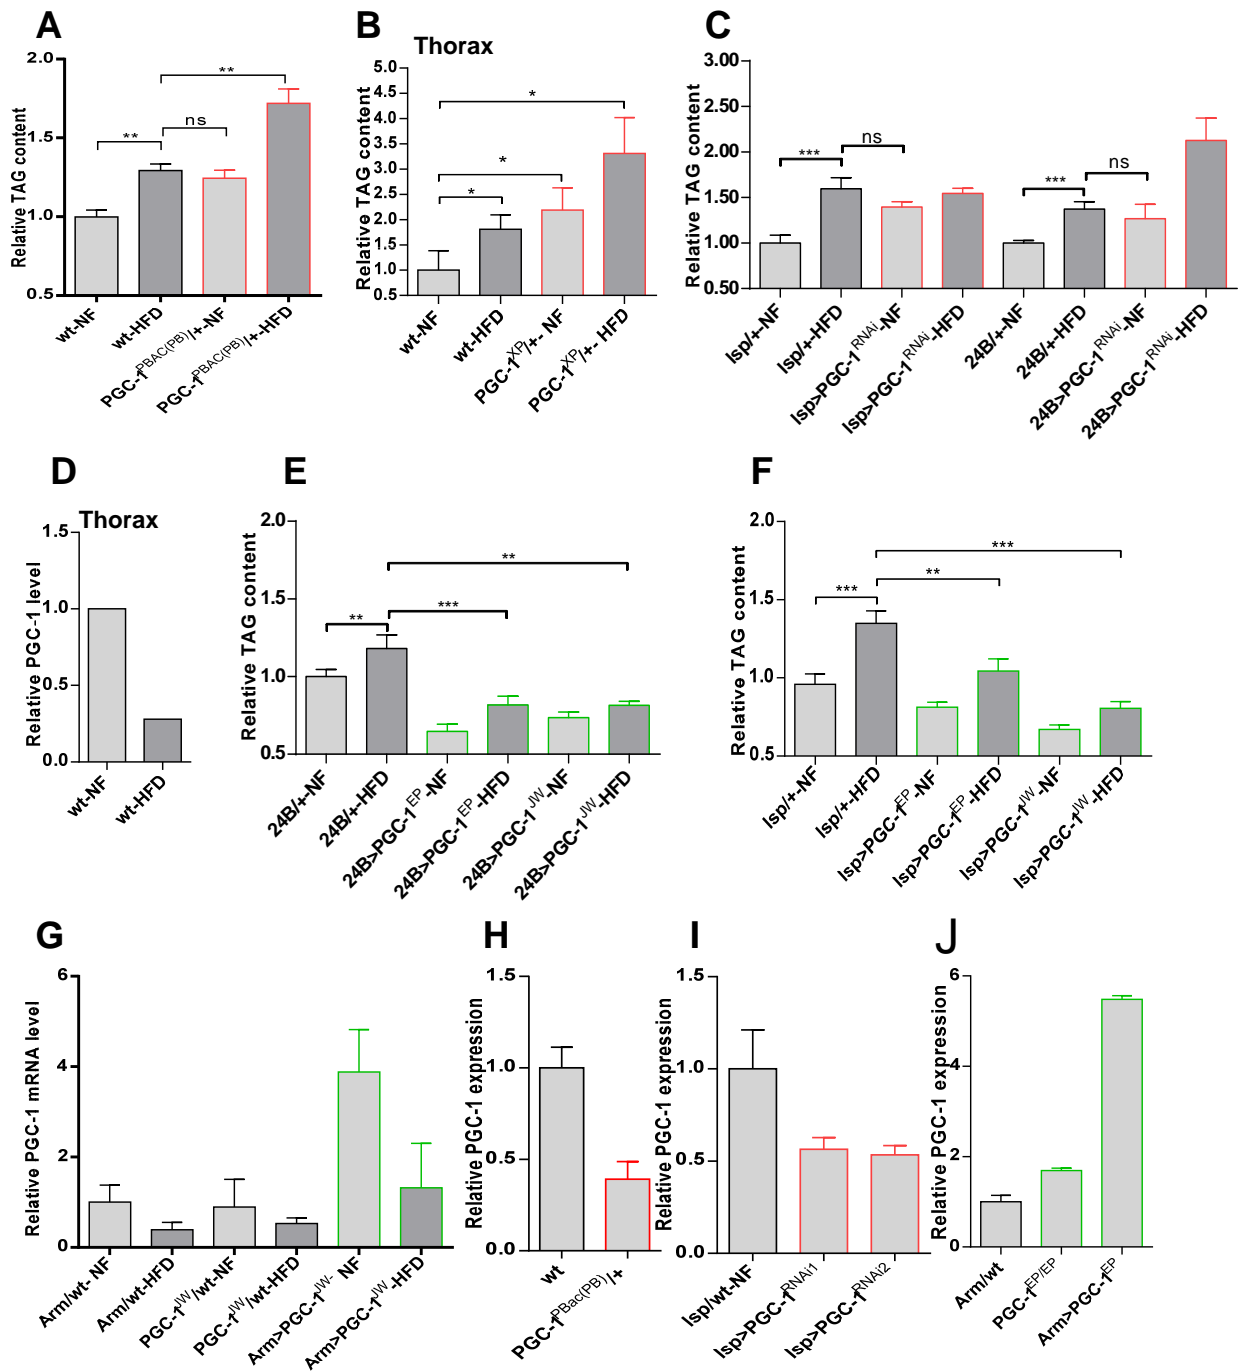

**Figure S1. Reduced *PGC-1/srl* Function Mediates the Effect of HFD on Obesity, related to Figure 1.**

(A) Relative TAG content of wt and *PGC-1<sup>Δsrl</sup>* mutant flies on NF or HFD. Results are expressed as the fold difference in whole fly TAG compared with wt-NF flies and are the mean ± SEM of at least 27 for all genotypes and conditions. \*P < 0.05, one way ANOVA test. ns: not significant

(B) Relative TAG content in muscle rich thoracic tissue of wt and *PGC-1/srl* heterozygous flies. Results are expressed as the fold difference compared with wt-NF flies and are the mean ± SEM of 35 ≤ n ≤ 24. \*P < 0.01, one way ANOVA test.

(C) Relative whole fly TAG content of control flies or flies with adipose-specific and muscle-specific knockdown of *PGC-1/srl*. Results are expressed as the fold difference compared with *lsp/+*-NF or *24B/+*-NF flies and are the mean ± SEM of 36 ≤ n ≤ 16. \*\*\*P < 0.001, one way ANOVA test.

(D) *PGC-1/srl* mRNA expression in the thorax of wt flies fed NF and HFD. Results are the mean of n = 20.

(E-F) Whole fly TAG content of flies with (E) muscle-specific or (F) adipose-specific *PGC-1/srl* overexpression. Results are expressed as the fold difference compared with *lsp<sup>+/+</sup>*-NF or *24B/+*-NF flies and are the mean ± SEM of 24 ≤ n ≤ 21. \*\*P < 0.01, \*\*\*P < 0.001, one way ANOVA test.

(G) Relative *PGC-1/srl* expression in controls (*Arm/wt*, *PGC-1<sup>JW</sup>/wt*) and *PGC-1/srl* overexpression flies (*Arm/PGC-1<sup>JW</sup>*) on NF or HFD. Results are expressed as the fold difference compared with *Arm/wt* on NF.

(H-J) Relative *PGC-1/srl* expression in *PGC-1<sup>PBAC</sup>* (H), adipose-specific *PGC-1<sup>RNAi</sup>* (I), and *Arm>PGC-1<sup>EP</sup>* flies (J). Results are expressed as the fold difference compared with the indicated wt or NF-fed flies and are the mean ± SD of n = 20.

**Figure S2**

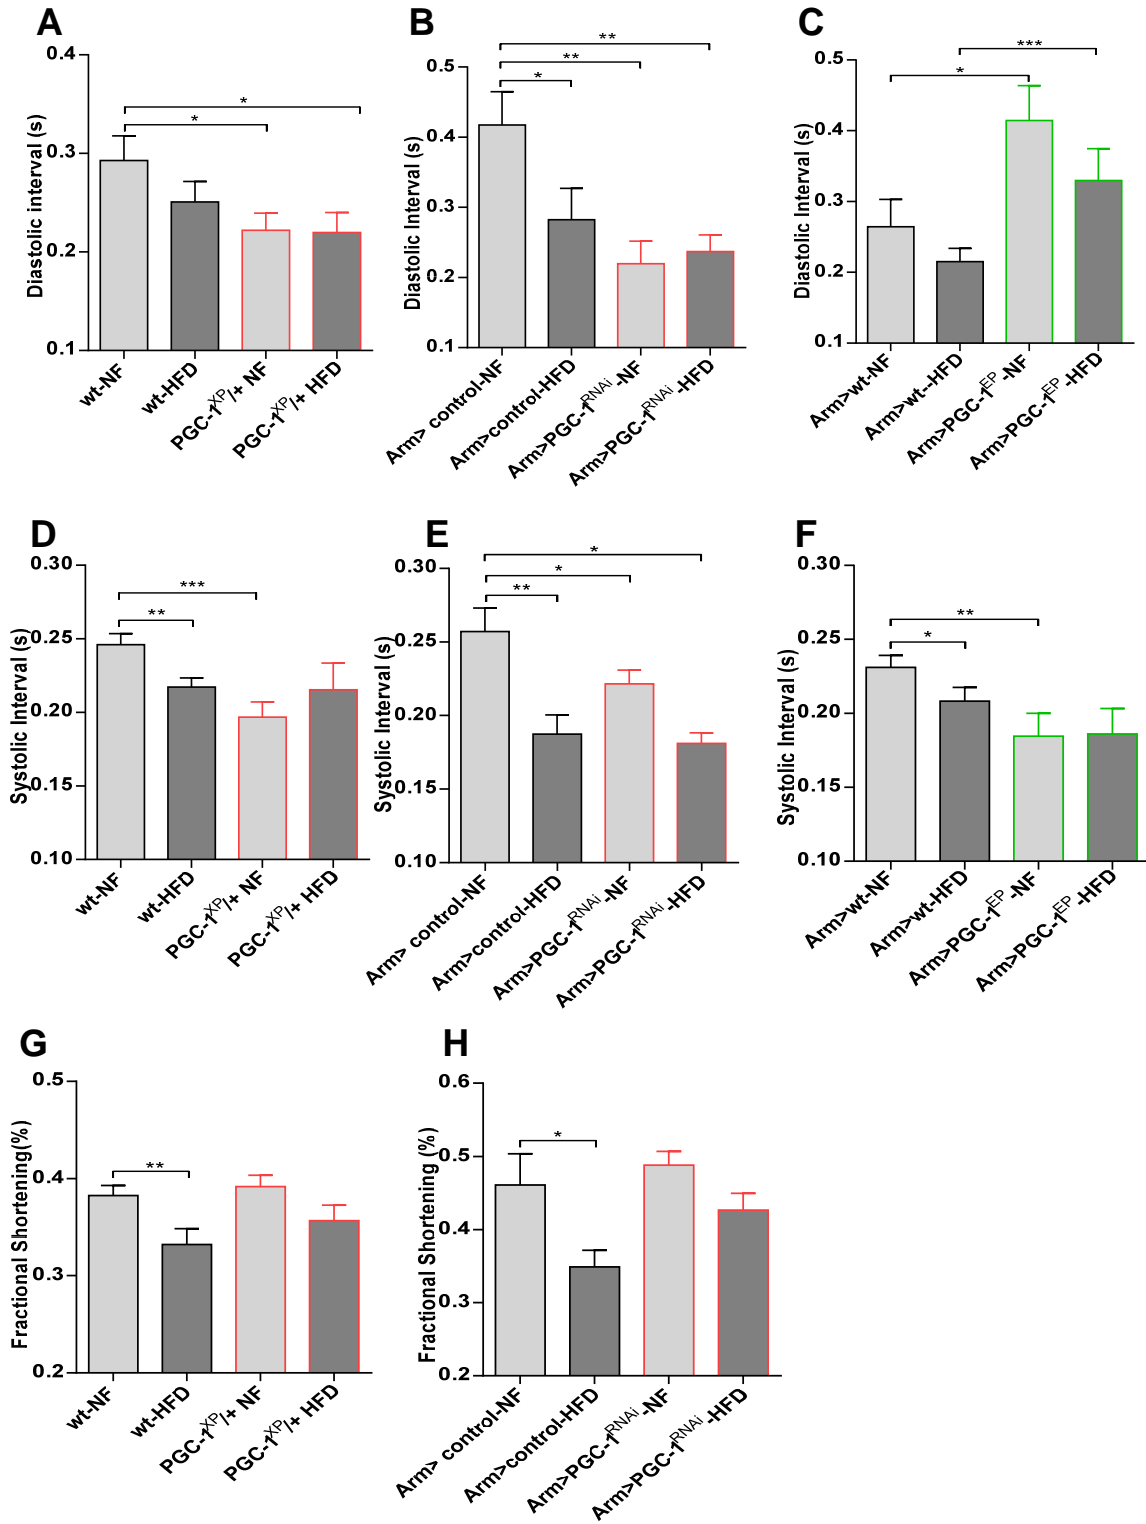

**Figure S2. As HFD, reduced *PGC-1/srl* function increases heart rate, [related to Figure 2](#).**

(A) Mean diastolic intervals of wt and *PGC-1* heterozygous flies on NF and HFD. Results are the mean  $\pm$  SEM of  $45 \leq n \leq 33$ . \*P < 0.05, one way ANOVA test.

(B) Mean diastolic intervals of control and *PGC-1* knockdown flies. Results are the mean  $\pm$  SEM of  $20 \leq n \leq 22$ . \*P < 0.05, \*\*P < 0.01, one way ANOVA test.

(C) Mean diastolic intervals of control and *PGC-1*-overexpressing flies. Results are the mean  $\pm$  SEM of  $32 \leq n \leq 16$ . \*P < 0.05, \*\*\*P < 0.001, one way ANOVA test.

(D–F) Mean systolic intervals of control and (D) *PGC-1* mutant flies, (E) *PGC-1* knockdown flies, and (F) *PGC-1*-overexpressing flies on NF and HFD. Results are the mean  $\pm$  SEM. \*P < 0.05, \*\*P < 0.01, \*\*\*P < 0.001, one way ANOVA test.

(G–H) Contractility changes (measured as % fractional shortening) in hearts from control and (G) *PGC-1* mutant flies, (H) *PGC-1* knockdown flies. Results are the mean  $\pm$  SEM. Statistical significance for all experiments was determined using one-way ANOVA test, \*P < 0.05, \*\*P < 0.01, one way ANOVA test.

**Figure S3**

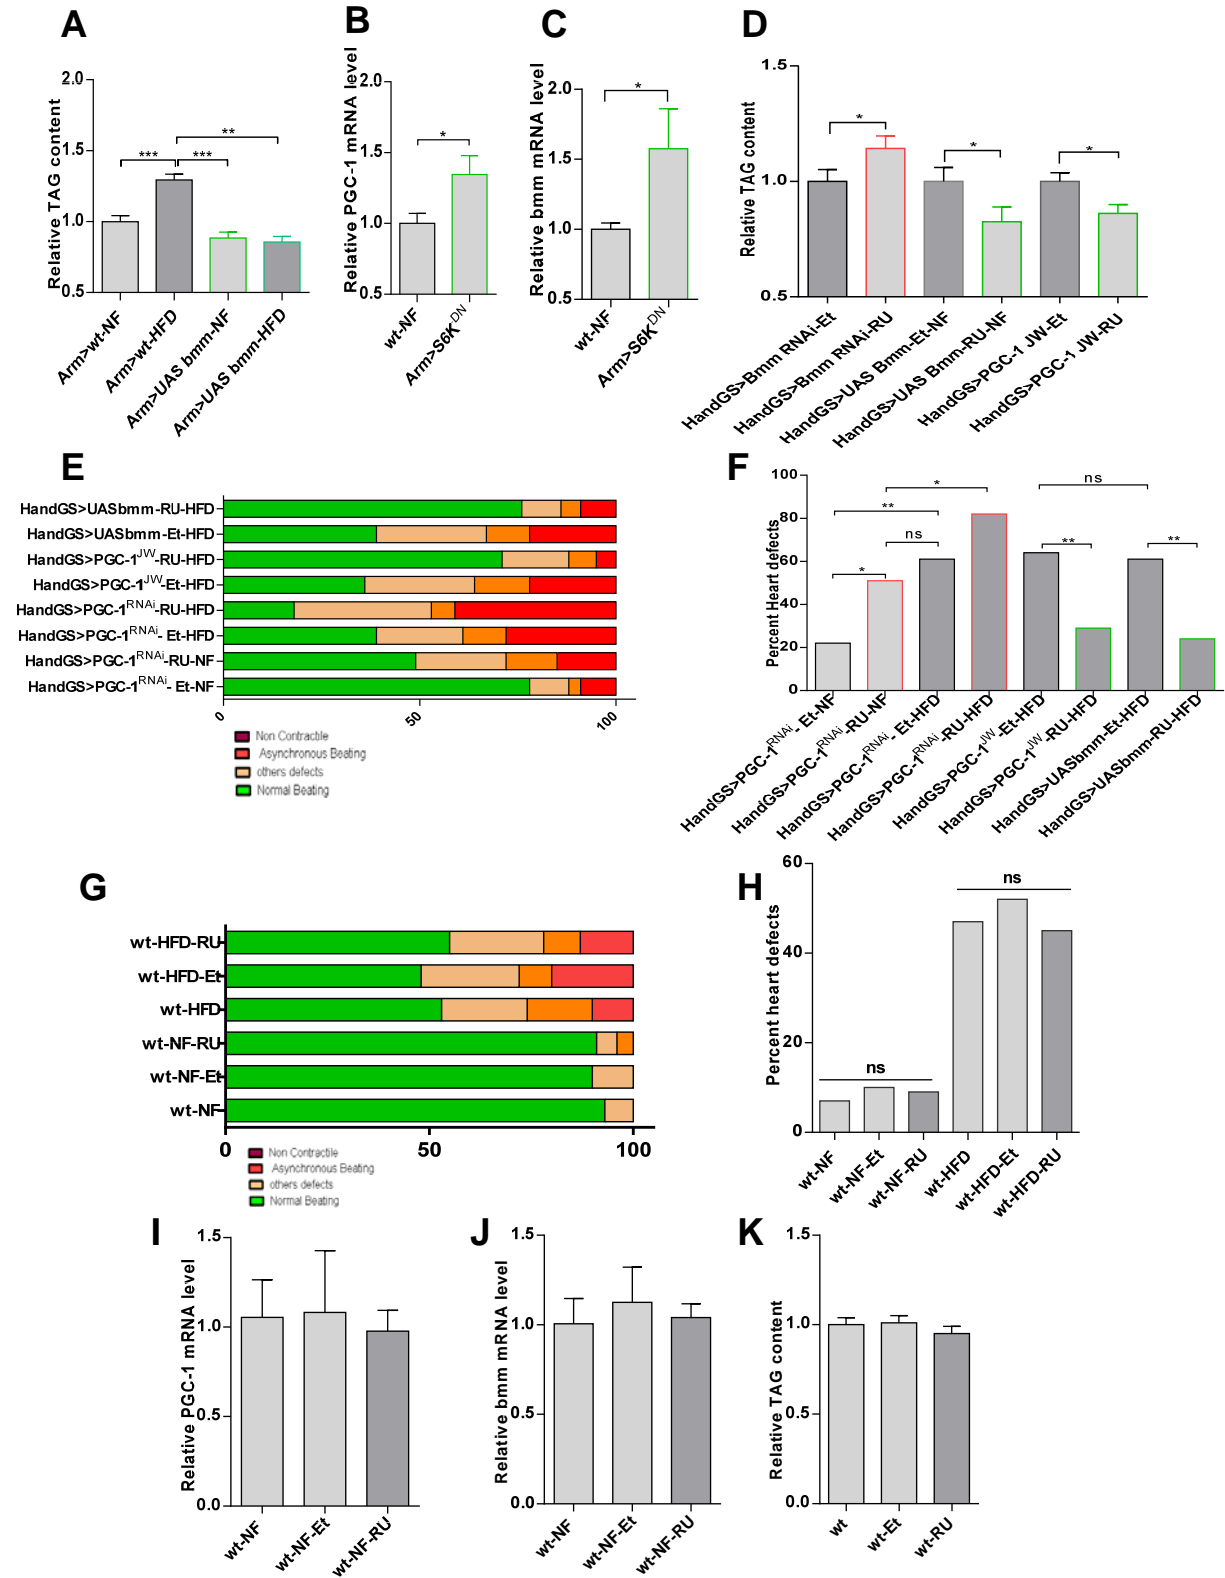

**Figure S3. Adult-specific *PGC-1/srl* manipulation in the heart, related to Figure 3.**

(A) TAG content of control and *bmm*-overexpressing (*UAS-bmm*) flies. Results are expressed as the fold difference in whole fly TAG compared with *Arm>wt-NF* flies and are the mean  $\pm$  SEM of  $n = 36$  for all genotypes. \*\* $P < 0.01$ , \*\*\* $P < 0.001$ , one way ANOVA test.

(B-C) Relative *PGC-1/srl* (B) and *bmm* (C) mRNA levels in wt and dominant-negative *S6K* flies. Results are expressed as the fold difference compared with wt flies. \* $P < 0.05$ , student t-test.

(D) TAG content of control (ethanol vehicle) and RU treatment of *HandGS>bmm<sup>RNAi</sup>*, *HandGS>UASbmm* and *HandGS>PGC-1<sup>JW</sup>* flies. Results are expressed as the fold difference from wt in whole fly TAG.  $36 \leq n \leq 18$ . \* $P < 0.05$ , ANOVA test.

(E) Graphical representation of the proportion of flies with adult cardiac specific manipulation of *PGC-1/srl* and *bmm* displaying heart dysfunction phenotypes, classified as non-contractile regions, asynchronous beating, and other defects (dysfunctional ostia, narrowed heart regions, and transmission defects).

(F) Quantification of heart defects shown in D,  $39 \leq n \leq 17$ . Statistics: Chi-square test. *Hand-GS>PGC-1<sup>RNAi</sup>-Et-NF* vs. *Hand-GS>PGC-1<sup>RNAi</sup>-RU-NF*,  $\chi^2 = 6.44$ ;  $P < 0.05$ . *Hand-GS>PGC-1<sup>RNAi</sup>-RU-NF* vs. *Hand-GS>PGC-1<sup>RNAi</sup>-RU-HFD*,  $\chi^2 = 4.79$ ;  $P < 0.05$ . *Hand-GS>PGC-1<sup>RNAi</sup>-Et-NF* vs. *Hand-GS>PGC-1<sup>RNAi</sup>-Et-HFD*,  $\chi^2 = 7.69$ ;  $P < 0.01$ . *Hand-GS>PGC-1<sup>RNAi</sup>-RU-NF* vs. *Hand-GS>PGC-1<sup>RNAi</sup>-Et-HFD*,  $\chi^2 = 0.47$ ; ns. *Hand-GS>PGC-1<sup>JW</sup>-Et-HFD* vs. *Hand-GS>PGC-1<sup>JW</sup>-RU-HFD*,  $\chi^2 = 8.46$ ;  $P < 0.01$ . *Hand-GS>UAS-bmm-Et-HFD* vs. *Hand-GS>UAS-bmm-RU-HFD*,  $\chi^2 = 5.57$ ;  $P < 0.05$ . *Hand-GS>PGC-1<sup>JW</sup>-Et-HFD* vs. *Hand-GS>UAS-bmm-Et-HFD*,  $\chi^2 = 0.03$ ; ns. *Hand-GS>PGC-1<sup>JW</sup>-RU-HFD* vs. *Hand-GS>UAS-bmm-RU-HFD*,  $\chi^2 = 0.20$ ; ns.

(G) Graphical representation of the proportion of flies displaying cardiac defects from ethanol or RU treatment of wt flies.

(H) Quantification of heart defects shown in G,  $25 \leq n \leq 18$ .

(I-J) Relative expression of *ATGL/bmm* (E) or *PGC-1/srl* in the heart of wt flies treated with ethanol or RU, compared to non-treated wt.

(K) Relative TAG content of wt flies treated with ethanol or RU compared to non-treated wt. Results are expressed as the fold difference in whole fly TAG.  $36 \leq n \leq 33$ .

**Figure S4**

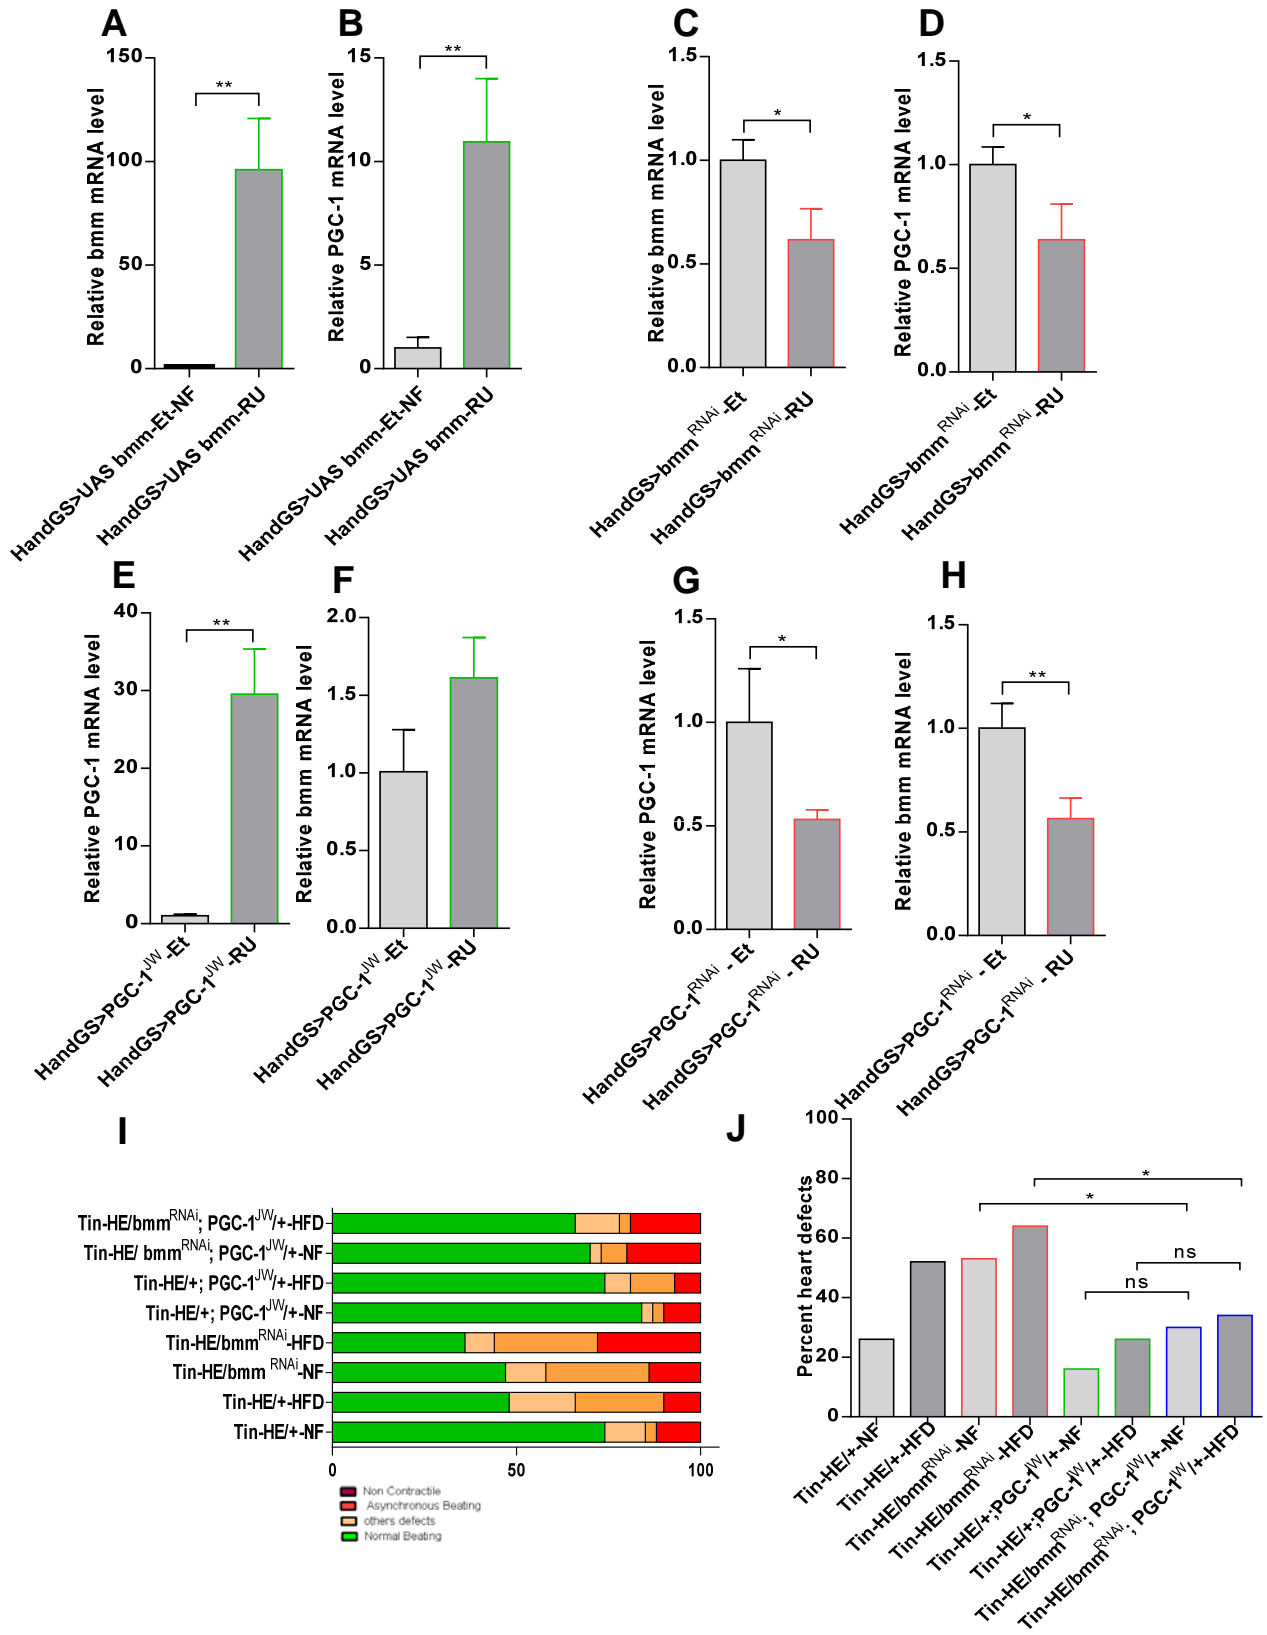



**Figure S4. Genetic interaction between *PGC-1/srl* and *ATGL/bmm*, related to Figure 4.**

(A-H) Relative expression of *bmm* (A, C, F, H) and *PGC-1/srl* (B, D, E, G) in the heart of ethanol vehicle or RU treated *Hand-GS>UASbmm*, *Hand-GS>bmm<sup>RNAi</sup>*, *Hand-GS>PGC-1<sup>RNAi</sup>*, *HandGS>PGC-1<sup>JW</sup>* flies.

(I) Graphical representation of the proportion of flies with cardiac specific manipulation of *bmm* and/or *PGC-1/srl* displaying heart dysfunction phenotypes, classified as non-contractile regions, asynchronous beating, and other defects (dysfunctional ostia, narrowed heart regions, and transmission defects).

(J) Quantification of heart defects shown in (A),  $29 \leq n \leq 24$ . Statistics: Chi-square test. *Tin-HE/bmm<sup>RNAi</sup>-NF* vs. *Tin-HE/bmm<sup>RNAi</sup>; PGC-1<sup>JW</sup>-NF*,  $\chi^2 = 4$ ;  $P < 0.05$ . *Tin-HE/bmm<sup>RNAi</sup>-HFD* (n = 25) vs. *Tin-HE/bmm<sup>RNAi</sup>; PGC-1<sup>JW</sup>-HFD*,  $\chi^2 = 5$ ;  $P < 0.05$ . *Tin-HE/+; PGC-1<sup>JW</sup>-NF* vs. *Tin-HE/bmm<sup>RNAi</sup>; PGC-1<sup>JW</sup>-NF*,  $\chi^2 = 0.9$ ; not significant (ns). *Tin-HE/+; PGC-1<sup>JW</sup>-HFD* vs. *Tin-HE/bmm<sup>RNAi</sup>; PGC-1<sup>JW</sup>-HFD*,  $\chi^2 = 0.2$ ; ns.

Figure S5

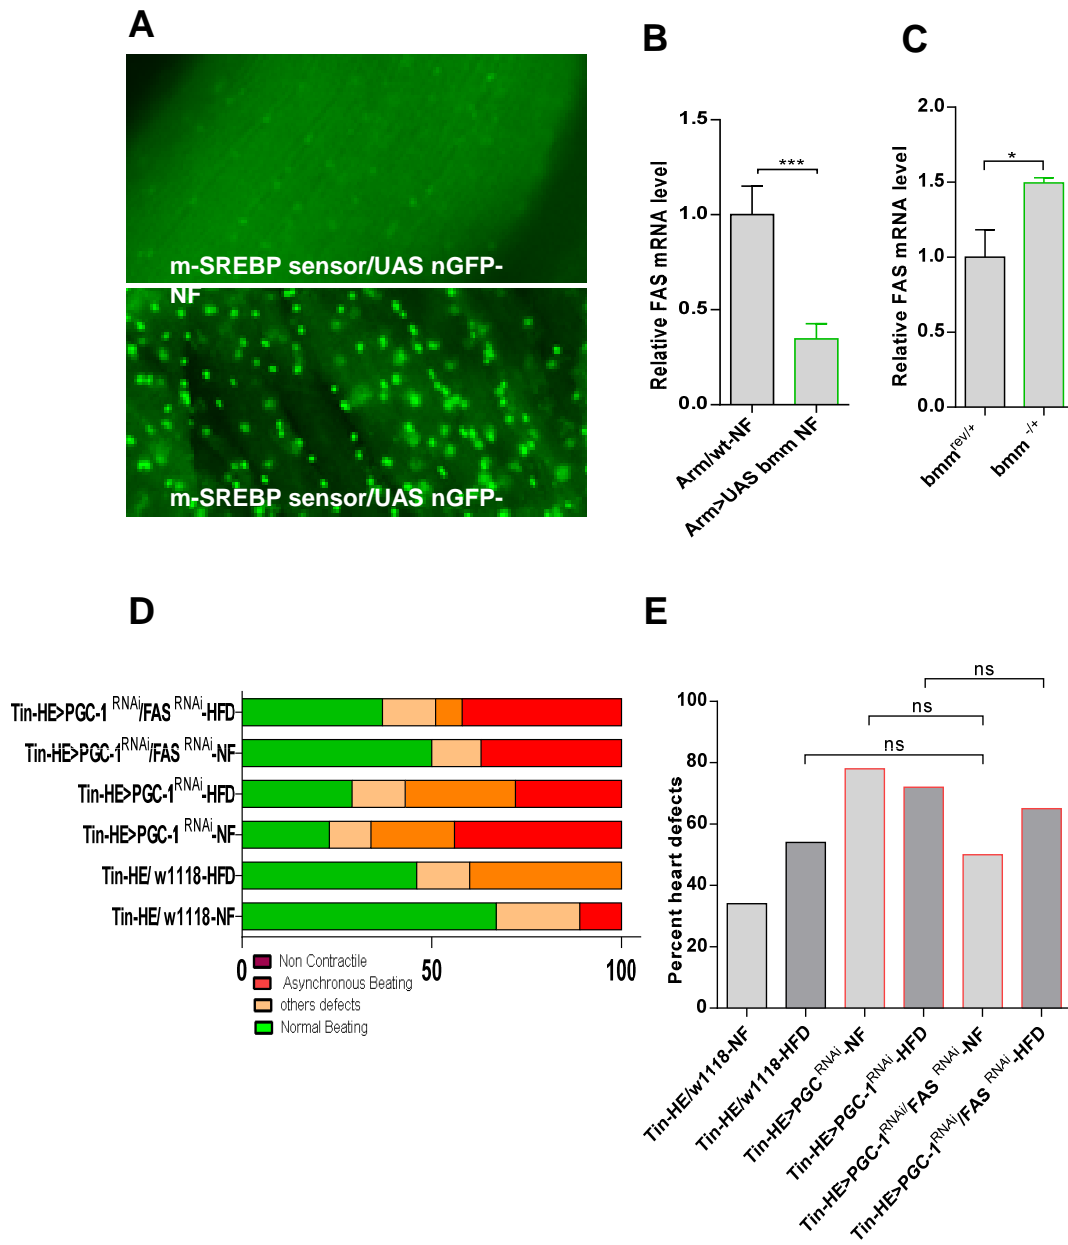

**Figure S5. Genetic interaction between *PGC-1/srl* and *FAS*, related to Figure 5.**

(A) Representative micrographs of sections of thoracic muscles of flies carrying a UAS-GFP/SREBP sensor and fed NF (top) or HFD (bottom). Sections were stained with anti-GFP antibody (green).

(B-C) Relative *FAS* mRNA levels in *bmm* overexpression (B) and mutant (C) flies. Results are expressed as the fold difference compared to Arm/wt (B) and *bmm<sup>ev</sup>*(C). \*P < 0.05, \*\*\*P < 0.001, student t-test.

(D) Graphical representation of the proportion of flies with cardiac specific manipulation of *PGC-1/srl* and/or *FAS* displaying heart dysfunction phenotypes, classified as non-contractile regions, asynchronous beating, and other defects (dysfunctional ostia, narrowed heart regions, and transmission defects).

(E) Quantification of heart defects shown in (D),  $20 \leq n \leq 12$ . Statistics: Chi-square test. *Tin-HE/+; PGC-1<sup>RNAi</sup>-NF* vs. *Tin-HE/+; PGC-1<sup>RNAi</sup>/FAS<sup>RNAi</sup>-NF*,  $\chi^2 = 0$ ; ns. *Tin-HE/+; PGC-1<sup>RNAi</sup>-HFD* ( $n = 12$ ) vs. *Tin-HE/+; PGC-1<sup>RNAi</sup>/FAS<sup>RNAi</sup>-HFD*,  $\chi^2 = 0.34$ ; ns. *Tin-HE/wt-HFD* ( $n = 20$ ) vs. *Tin-HE/+; PGC-1<sup>RNAi</sup>/FAS<sup>RNAi</sup>-HFD*,  $\chi^2 = 0.08$ , ns. not significant (ns).

## Supplemental movies

Movie S1: normal heart beating of wildtype flies fed NF, [related to heart dysfunction graphs](#)

Movie S2: HFD feeding induces increased heart rate, [related to heart dysfunction graphs](#)

Movie S3: Reduced *PGC-1/srl* function induces increased heart rate under normal conditions, [related to heart dysfunction graphs](#)

Movie S4: Reduced *PGC-1/srl* function induces increased heart rate under HFD conditions, [related to heart dysfunction graphs](#).

Movie S5: HFD or reduced *PGC-1/srl* function causes non-contractile regions, [related to heart dysfunction graphs](#).

Movie S6: HFD or reduced *PGC-1/srl* function causes heart asynchronous beating, [related to heart dysfunction graphs](#).

Movie S7: HFD or reduced *PGC-1/srl* function causes dysfunctional ostia, [related to heart dysfunction graphs](#).

## Supplemental Experimental Procedures

### Drosophila stocks

*w<sup>1118</sup>* (wildtype controls), *PGC-1<sup>XP</sup>* (CG9809<sup>d04518</sup>), *PGC-1<sup>PBAC</sup>* (CG9809<sup>c05624</sup>), *PGC-1<sup>EP</sup>* (CG9809<sup>EY0593</sup>), and *Arm-Gal4* (ubiquitous driver) flies were obtained from the Bloomington *Drosophila* Stock Center. Flies containing a genomic rescue transgene (*PGC-1<sup>GR</sup>*) were obtained from Christian Frei (Tiefenböck et al, 2010). UAS-*PGC-1<sup>RNAi1</sup>* flies were obtained from the NIG Stock Center in Japan. UAS-*PGC-1<sup>RNAi2</sup>* flies, GD controls lines and *bmm<sup>RNAi</sup>* flies were obtained from the VDRC Stock Center in Vienna. *dPGC-1<sup>JW</sup>* (“J” meaning Jones and “W” meaning Walker) was from L. Jones and D. Walker (Rera et al., 2011), *bmm<sup>1</sup>* mutants, *Bmm<sup>Rev</sup>* and the UAS-*bmm* overexpression line were from R. Kuehnlein (Gronke et al., 2005), *TOR<sup>7/P</sup>* flies were as described in Luong et al. (2006), *S6K<sup>DN</sup>* was from M. Stewart. Hand(GS)-Gal4 flies [driving expression in myocardial as well as pericardial cells upon induction](#) was generous gifts from L. Perrin; Monnier et al., 2013). The *Isp-Gal4* (fat body driver) was reported in Cherbas et al. (2003), and GMH5 and TinHE ([myocardial-specific heart drivers](#)) were described in Wessells et al. (2004). Hand4.2-Gal4 flies [driving strong expression in myocardial as well as pericardial cells](#) were from Z. Han (Han et al., 2006). pP{GAL4-dSREBPg} flies (SREBP cleavage sensor line) were from R. Rawson (Kunte et al., 2006). In this construct, the DNA-binding domain of SREBP (mature SREBP) is replaced with VP16-Gal4; thus, when SREBP is cleaved, VP16-Gal4 activates genes downstream of UAS sites (i.e., UAS-nGFP).

### Triglyceride assay

For each genotype and gender, 36 flies were weighed and placed into a 96-well grinding plate (Brand Tech Scientific, 96 Deep Well plates Cat. # 701350). One metal ball (OPS Diagnostics, 5000 44C SS 5/32-inch, part # GBSS156-5000-01), three flies, and 600  $\mu$ l of PBS containing 0.05% Triton X-100 were added to each well. The plate was transferred to a shaker (Talboys Cat. # 930145) and shaken for 3 min at the highest speed setting. The plate was centrifuged for 15 min at 4500 rpm and 4°C, and aliquots of 20  $\mu$ l supernatant were transferred to a new plate containing 200  $\mu$ l/well of lipid reagent (Thermo Electron, Cat. # TR22421/2780-250). The reaction mixture was incubated at 37°C for 10 min, and the absorbance at 550 nm was then measured (Spectramax M2e, Molecular Devices). Triglyceride (TAG) content was calculated from a standard curve constructed with triglyceride solutions of known concentrations (Thermo Electron, Cat. # TR222923) according to the manufacturer’s instructions.

### Real-time quantitative PCR (qPCR) analysis

For whole fly samples, total RNA was extracted with Trizol reagent (Roche Diagnostics). Reverse transcription (RT) was performed on aliquots of 1 µg total RNA using a QuantiTect Reverse Transcription Kit (Qiagen) according to the manufacturer's instructions. qPCR amplification reactions were prepared with 5 µl of the RT reaction diluted in qPCR reaction mix (LightCycler FastStart DNA MasterPlus SYBR Green I, Roche) containing the PCR primers. Thermal cycling and fluorescence monitoring were performed in a LightCycler 2.0 sequence detector (Roche Diagnostics). Samples were analyzed in triplicate.

For heart-specific qPCR, a Cells-to-CT™ Kit (Ambion) was used. 20 hearts were dissected as described in the main text for semi-intact heart preparation, washed twice with PBS, and extracted and pool by group of 5 hearts in an Eppendorf tube containing 49.5 µl of Cells-to-CT lysis buffer and 0.5 µl DNase I. The lysis mixture was incubated for 5 min at 22°C, then 5 µl of Cells-to-CT stop solution was added and the mixture was incubated for 2 min at 20°C. The RT reaction was performed by mixing 20 µl of lysate with 30 µl of RT master mix (1× RT buffer, 1× primer, and 1× RT enzyme), and incubating in the thermal cycler. qPCR amplification was performed by mixing 5 µl of the RT reaction with 15 µl of Cells-to-CT qPCR master mix containing the appropriate PCR primers. Thermal cycling and fluorescence monitoring were performed in a LightCycler 2.0.

### **Western Blotting**

Wildtype and *PGC-1/srl* mutant flies were aged for 5–10 days on NF and then placed on NF or HFD (NF containing 30% coconut oil) for a further 5 days. Twenty each of NF and HFD flies were homogenized in RIPA buffer (Thermo Scientific) containing phosphatase and protease inhibitors (Roche). Protein levels were quantified using Bradford Reagent (Bio-Rad, Cat. # 500-0201), and samples of 40 µg total protein were separated by SDS/PAGE using Novex NuPAGE® 4–12% Bis-Tris Gels (Invitrogen). Proteins were transferred to nitrocellulose membranes (Invitrogen) and the membranes were blocked with 1x TBS-T tween O/N. Blots were incubated for 1 h at room temperature with rabbit anti-phospho-Akt, rabbit anti-phospho-S6K (both Cell Signaling Technologies), rabbit anti-SREBP (BD Pharmingen), mouse anti-actin (Millipore), or mouse anti-GFP (Invitrogen) primary antibodies diluted 1:1000 in Tris-buffered saline containing 1xTBS-T tween and 5% BSA. After washing, blots were incubated for 1 h at room temperature with HRP-conjugated anti-rabbit or anti-mouse secondary antibodies (Amersham) diluted 1:5000 in 5% BSA in TBST. Blots were washed again and bands were visualized using the ECL plus enhanced chemiluminescence reagent (Amersham, Cat. # RPN2132).

## **Immunocytochemistry**

Hearts were dissected as described above, incubated with 10 mM EGTA for 30 s to induce muscle relaxation, fixed with 4% paraformaldehyde in PBS for 20 min at room temperature, and then washed three times for 10 min with PBS containing 0.05% Triton X-100 (PBT). Hearts were transferred to a 96-well plate (10–15 per well) and incubated in blocking buffer (PBT containing 5% BSA) for 1 h. Mouse anti-GFP and anti-phalloidin primary antibodies were diluted 1:500 in PBT and added to the wells for 1 h at room temperature or overnight at 4°C. Hearts were washed three times with PBT and incubated for 1 h at room temperature with the appropriate Alexa Fluor-conjugated secondary antibody diluted 1:1000 in PBT. Samples were washed three times with PBT, once with PBS, and then placed on a slide in a drop of Vectashield mounting medium. For staining of lipid droplets, a stock solution of 1 mg/ml Nile Red was prepared in acetone and stored protected from light at 4°C. Hearts were fixed with 4% formaldehyde for 20 min at room temperature, washed three times with PBS for 10 min each, and then incubated with 10 µg/ml Nile Red in PBS for 5 min. Stained hearts were washed with PBS and mounted in Vectashield for analysis. Images were acquired with a Zeiss ApoTome microscope using Zeiss imaging software.

## **GeneSwitch**

GeneSwitch system uses a RU-dependent Gal4 that allow the spatiotemporal activation of specific UAS line in the fly (Monnier et al., 2012; Osterwalder et al., 2001; Roman et al., 2001). We established a stock solution of 25 mg/ml of RU486 (Mifepristone) dissolved in ethanol. For adult flies feeding, this stock solution was diluted to 100µg/ml directly into the fly food with or without HFD. Flies carrying Hand-GS-Gal4 Gene Switch (Hand-GS) drivers were crossed to *PGC-1<sup>RNAi</sup>* for KD, *UAS-PGC-1<sup>JW</sup>* and *UAS-bmm* flies for overexpression. The offspring *Hand-GS>PGC-1<sup>RNAi</sup>*, *Hand-GS>PGC-1<sup>JW</sup>* and *Hand-GS>UAS-bmm* flies aged 3-5days after eclosion were transferred into tubes (25 flies/tube) of normal fly food containing RU or vehicle (ethanol). After 5 days feeding, flies were transferred into new tubes containing NF or HFD with RU or vehicle for 5 more days. The fly hearts are then dissected for heart function analysis and qPCR experiments.

## **Statistical Analysis**

Statistical analysis was done using Student's t-tests, ANOVA, chi-square or Kruskal-Wallis tests where appropriate. The analysis was performed using GraphPad Prism versions 5.00 and 6.00 for Windows.

## Supplemental References

Cherbas, L., Hu, X., Zhimulev, I., Belyaeva, E., and Cherbas, P. (2003). EcR isoforms in *Drosophila*: testing tissue-specific requirements by targeted blockade and rescue. *Development* 130, 271–284.

Han, Z., Yi, P., Li, X., and Olson, E.N. (2006). Hand, an evolutionarily conserved bHLH transcription factor required for *Drosophila* cardiogenesis and hematopoiesis. *Development* 133, 1175–1182.

Monnier, V., Iche-Torres, M., Rera, M., Contremoulins, V., Guichard, C., Lalevee, N., Tricoire, H., and Perrin, L. (2012). dJun and Vri/dNFIL3 are major regulators of cardiac aging in *Drosophila*. *PLoS Genet* 8, e1003081.

Osterwalder, T., Yoon, K.S., White, B.H., and Keshishian, H. (2001). A conditional tissue-specific transgene expression system using inducible GAL4. *Proc Natl Acad Sci U S A* 98, 12596-12601.

Wessells, R.J., Fitzgerald, E., Cypser, J.R., Tatar, M., and Bodmer, R. (2004). Insulin regulation of heart function in aging fruit flies. *Nat. Genet* 36, 1275–1281.
